# Supplementary material
Source: MDPI journal article supplement (https://www.mdpi.com/2073-4352/11/12/1530)
Supplement: s1 [file s1 › crystals-1456295-supplementary.pdf]

**Supplementary Materials:**

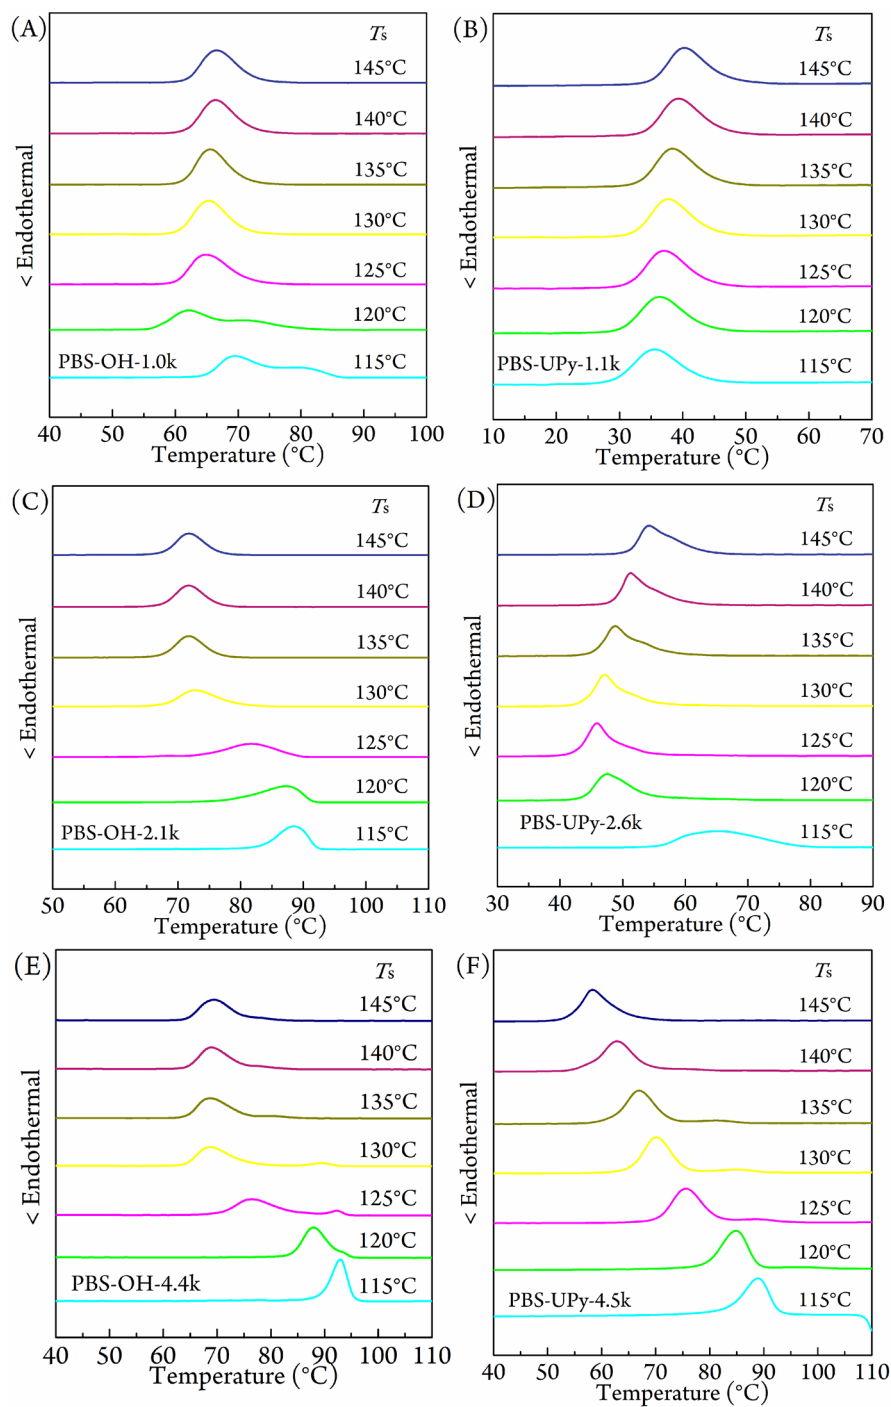

**Figure S1.** The cooling DSC curves of PBS-OH-1.0k (A), PBS-UPy-1.1k (B), PBS-OH-2.1k (C), PBS-UPy-2.6k (D), PBS-OH-4.4k (E) and PBS-UPy-4.5k (F) after being melted at different  $T_s$ .
